# Supplementary material for: Magnaporthe oryzae Glycine-Rich Secretion Protein, Rbf1 Critically Participates in Pathogenicity through the Focal Formation of the Biotrophic Interfacial Complex
Source: PLOS journal article supplement (doi:10.1371/journal.ppat.1005921), 2016-10-06
Supplement: S18 (10.1371/journal.ppat.1005921.s018) [file journal.ppat.1005921.s018]

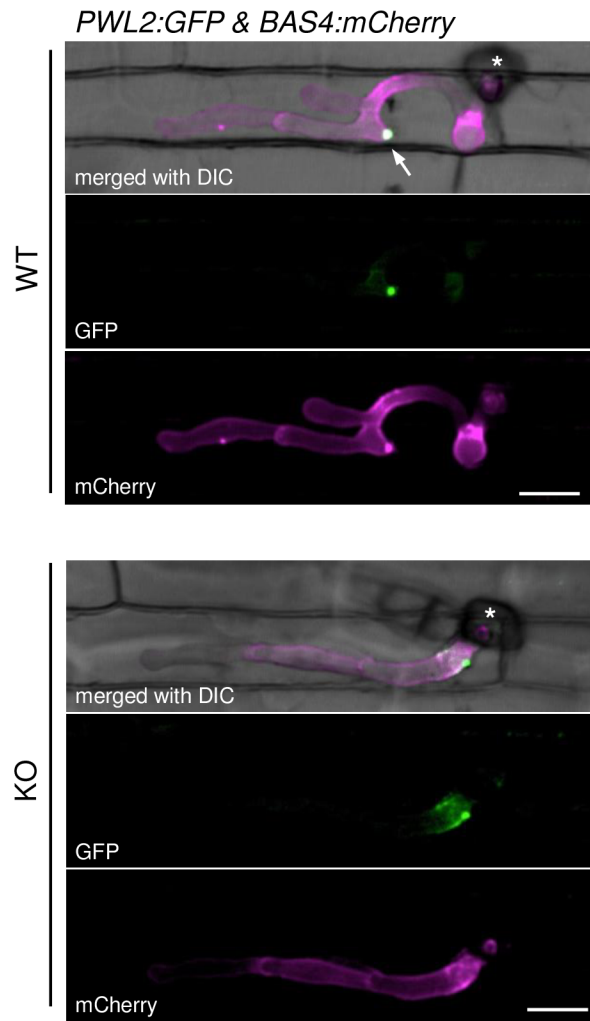

**S14 Fig. Confocal images of rice leaf sheath cells infected by the WT or  $\Delta rbf1-2$  (KO) line harboring *PWL2p::PWL2::GFP&BAS4p::BAS4::mCherry* at 36 hpi.**
