# Supplementary material for: Magnaporthe oryzae Glycine-Rich Secretion Protein, Rbf1 Critically Participates in Pathogenicity through the Focal Formation of the Biotrophic Interfacial Complex
Source: PLOS journal article supplement (doi:10.1371/journal.ppat.1005921), 2016-10-06
Supplement: S19 (10.1371/journal.ppat.1005921.s019) [file journal.ppat.1005921.s019]

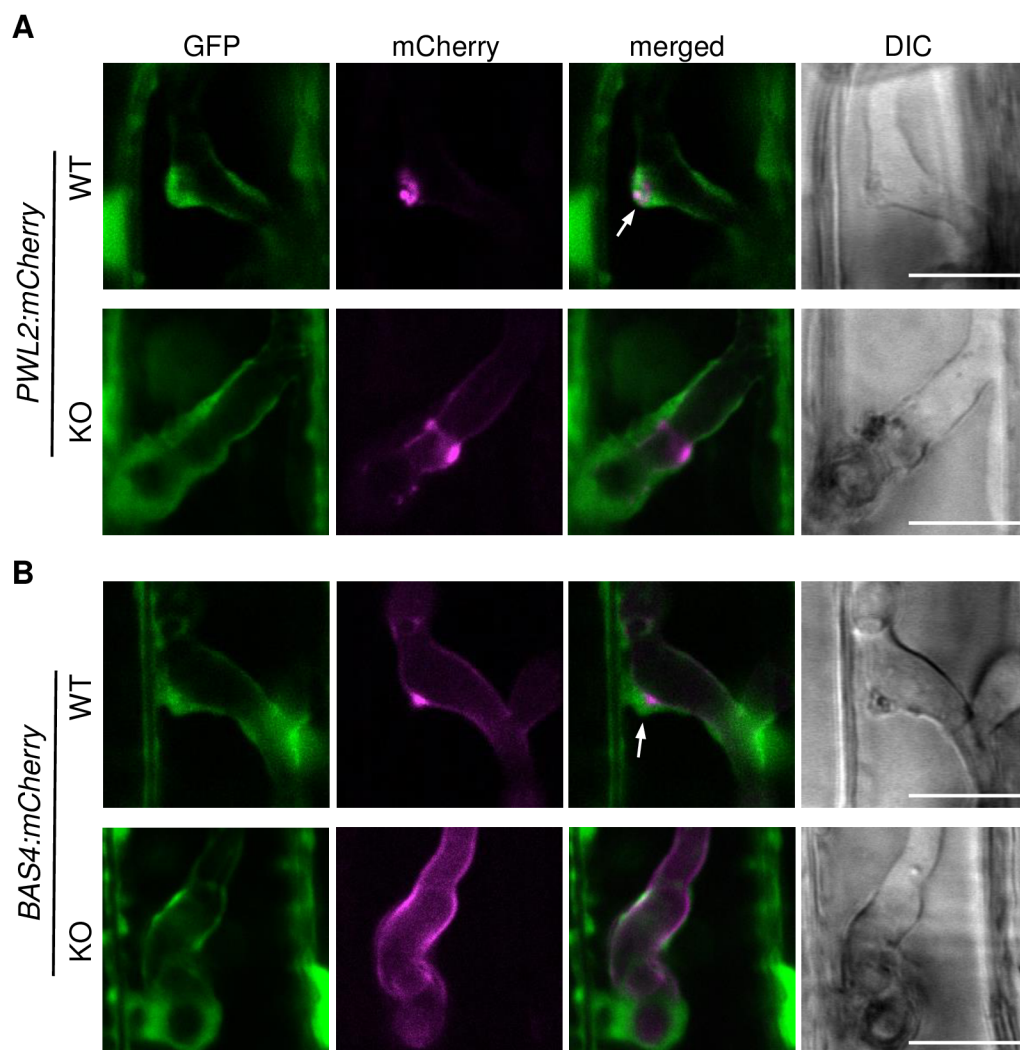

**S15 Fig. Comparison of BIC-associated accumulation of host cytosol between WT and KO.**
